# Supplementary figures and images for: Isolated catatonia-like executive dysfunction in mice with forebrain-specific loss of myelin integrity
Source: eLife journal article supplement (doi:10.7554/elife.70792), 2023-01-30

Figure 1D

Prefrontal cortex

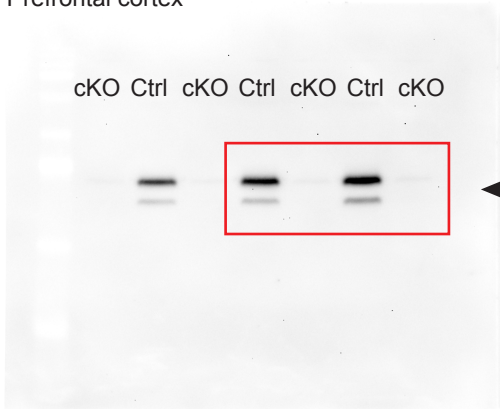

Cerebellum

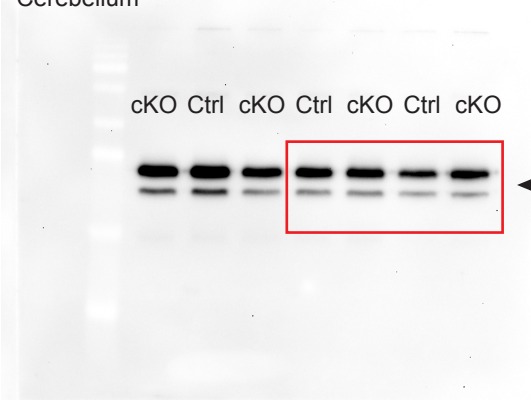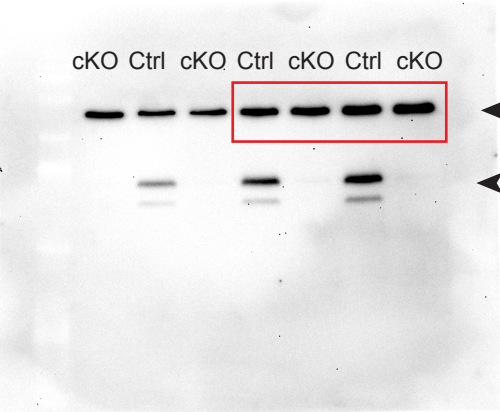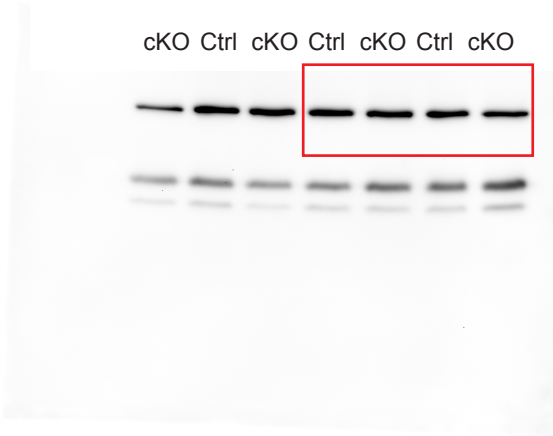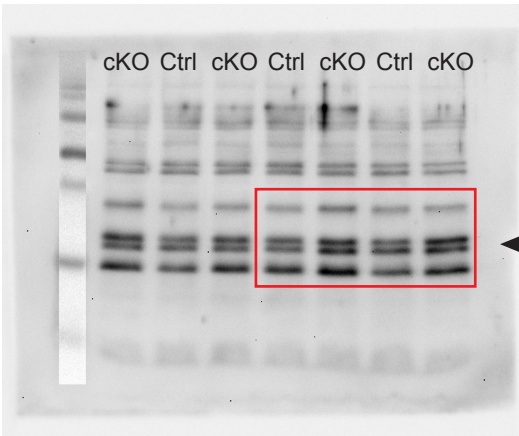

Supplement: fig1-data1 [file PLP-EMX-WB original.pdf › PLP-EMX-WB original.pdf]
